# Supplementary material for: Olefin metathesis in non-degassed solvent using a recyclable, polymer supported alkylideneruthenium
Source: Royal Society of Chemistry journal article supplement (doi:10.1039/b007304k), 2001-01-01
Supplement: b007304k.doc [file b007304k.doc]

### Supplementary Information

**(±)***5-(2-ethenylphenoxy) hexanoic acid* ***7***

Aqueous sodium hydroxide (1M, 2.5mL, 2.5mmol) was added to a stirring solution of *Methyl 5-(2-ethenylphenoxy) hexanoate* (0.6g, 2.4mmol) in dioxane (8mL). After 14 hours the reaction was concentrated and partitioned between diethyl ether (50mL) and water (50mL). The aqueous layer was washed with diethyl ether (2x50mL) and the combined organics washed with water (2x20mL). The combined aqueous layers were then acidified and extracted with diethyl ether (3x50mL). The organics were combined, washed with brine (2x50mL), dried over sodium sulfate, filtered and concentrated to afford the acid as a clear oil (0.5g, 89 %).

ν­max (neat)cm-1: 1695; δH (400MHz, CDCl3): 1.33 (3H, d, *J* 5.9 Hz, CHC*H*3), 1.67-1.92 (4H, m, C*H*2)2), 2.43 (2H, t, *J* 7.1 Hz, C*H*2COOCH3), 4.42 (1H, tq, *J* 5.9 Hz, C*H*CH3), 5.26 (1H, dd, *J* 11.0, 1.6 Hz, CHC*Hcis*CH*trans*), 5.74 (1H, dd, *J* 18.0, 1.6 Hz, CHCH*cis*C*Htrans*), 6.88 (1H, d, *J* 8.2 Hz, Ar-*H*), 6.93 (1H, d, *J* 7.4 Hz, Ar-*H*), 7.09 (1H, dd, *J* 18.0, 11.0 Hz, C*H*=CH2), 7.22 (1H, dd, *J* 8.2, 7.4 Hz, Ar-*H*), 7.50 (1H, d, *J* 7.4 Hz, Ar-*H*).; δC: 20.0 (3), 21.0 (2), 34.1 (2), 36.1 (2), 74.1 (1), 113.8 (1), 114.1 (2), 120.7 (1), 126.6 (1), 127.9 (0), 128.7 (1), 131.9 (1), 155.1 (0), 179.8 (0); *m/z* (FAB+) 235.1327 (MH+ - C14H18O3 requires 235.1334), 491 (38%, 2MNa+), 468 (34, 2M+), 377 (29, [3M/2]Na+), 354 (50, 3M/2]H+), 257 (39, MNa+), 235 (43, MH+).

*(±)N-Polystyrene 5-(2-ethenylphenoxy) hexanamide*

Diisopropylcarbodiimide (0.33mL, 2.12mmol) was added to a stirring solution of **(±)***5-(2-ethenylphenoxy) hexanoic acid* **7** (0.50g, 2.12mmol) and HOBt (0.29g, 2.12mmol) in DMF:CH2Cl2(1:1, 2mL). The reaction was stirred for ten minutes at room temperature, then added to a suspension of aminomethyl polystyrene (Advanced ChemTech, 0.5g, 1.3mmolg-1­, 0.65mmol) in DMF:CH2Cl2(1:1, 1mL). The vessel was then sealed and the mixture agitated by vertical 360˚ rotation for 12 hours, affording a resin that was negative to Kaiser analysis. The resin was then washed with 3x5mL portions of CH2Cl2, THF, DMF, DMF:MeOH (1:1), DMF, THF, CH2Cl2 successively. The resulting resin was then dried under high vacuum overnight.

*Preparation of polystyrene supported complex -* ***8***

A solution of Grubb’s alkylidene (53mg, 0.06 mmol) in degassed 1,2-dichloroethane (1 mL) was sonicated and added to a suspension of the polystyrene supported ligand (0.65 mmol) in the same solvent (1 mL). The vessel was sealed and the mixture agitated by vertical 360˚ rotation for 2 hours. The resin was then washed with dichloromethane until the filtrate was clear. The cycle of reaction and washing was continued a further four times, finally affording **8** as dark brown beads.

*Preparation of TentaGel complex* ***- 8***

Diisopropylcarbodiimide (60μL, 0.38mmol) was added to a stirring solution of **(±)***5-(2-ethenylphenoxy) hexanoic acid* (88mg, 0.38mmol) and HOBt (51mg, 0.38mmol) in DMF:CH2Cl2(1:1, 2mL). The reaction was stirred for ten minutes at room temperature, then added to a suspension of aminoTentaGel (Advanced ChemTech, 0.25g, 0.3mmolg-1­, 0.08 mmol) in DMF:CH2Cl2(1:1, 1mL). The vessel was then sealed and the mixture agitated by vertical rotation for 12 hours, affording a resin that was negative to Kaiser analysis. The resin was then washed with 3x5mL portions of CH2Cl2, THF, DMF, DMF:MeOH (1:1), DMF, THF, CH2Cl2 successively. The resulting resin was then dried under high vacuum overnight.

A solution of Grubb’s alkylidene (62mg, 0.08 mmol) in degassed 1,2-dichloroethane (1 mL) was sonicated and added to a suspension of TentaGel supported ligand (0.65 mmol) in the same solvent (1 mL). The vessel was sealed and the mixture agitated by vertical rotation for 12 hours. The resin was then washed with dichloromethane until the filtrate was clear and dried under vacuum to afford **8(TG)** as pale brown beads.

*General Procedure for RCM using* ***8***

All reactions (except Entry 5) were performed in a 3mL plastic solid phase synthesis tube fitted with a glass frit using general laboratory grade dichloromethane or methanol (BDH, GPRTM) without further purification.

25mg of diene in dichloromethane (0.5mL) was added to 25mg of resin **8** in a reaction tube. The tube was sealed and agitated by 360º rotation at room temperature. The solvent was then collected by filtration and the resin remaining in the tube washed with dichloromethane (3x2mL), the organics were combined, concentrated and analysed by 1H NMR.
